# Supplementary material for: One-Step Carbon Coating and Polyacrylamide Functionalization of Fe3O4 Nanoparticles for Enhancing Magnetic Adsorptive-Remediation of Heavy Metals
Source: MDPI journal article supplement (doi:10.3390/molecules22122074), 2017-11-27
Supplement: s1 [file s1]

# One-Step Carbon Coating and Polyacrylamide Functionalization of Fe<sub>3</sub>O<sub>4</sub> Nanoparticles for Enhancing Magnetic Adsorptive-Remediation of Heavy Metals

## Acid Stability Test

First, 0.1 g Fe<sub>3</sub>O<sub>4</sub> and polyacrylamide-functionalized Fe<sub>3</sub>O<sub>4</sub> were put separately in 50-mL tubes and 10 mL of 0.1M HCl was added. The mixtures were shaken for 6 h. The Fe<sub>3</sub>O<sub>4</sub> and polyacrylamide-functionalized Fe<sub>3</sub>O<sub>4</sub> were separated from the acid solution by the use of a magnet. The dissolved Fe ions were determined by AAS. The concentration of Fe ions in the case of Fe<sub>3</sub>O<sub>4</sub> was considered to be 100% dissolution.

For calculation of the dissolution %:

Dissolution % = (concentration of Fe ions in case of polyacrylamide-functionalized Fe<sub>3</sub>O<sub>4</sub> / concentration of Fe ions in case of Fe<sub>3</sub>O<sub>4</sub>) \* 100.

Protection % was calculated as follows:

Protection% = (1 - (concentration of Fe ions in case of poly-acrylamide modified Fe<sub>3</sub>O<sub>4</sub> / concentration of Fe ions in case of Fe<sub>3</sub>O<sub>4</sub>) \* 100.

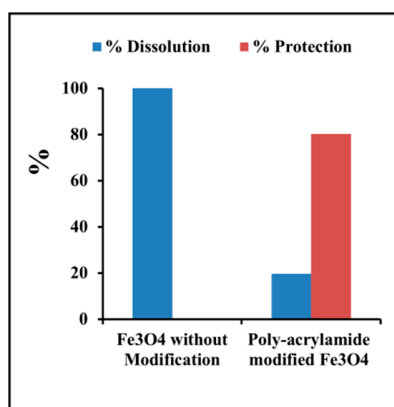

**Figure S1.** Determination of acid stability of Fe<sub>3</sub>O<sub>4</sub> and polyacrylamide-functionalized Fe<sub>3</sub>O<sub>4</sub>.

To evaluate the gained stability for the Fe<sub>3</sub>O<sub>4</sub> after functionalization with polyacrylamide, the effect of 0.1 M HCL on the Fe<sub>3</sub>O<sub>4</sub> and polyacrylamide-functionalized

$\text{Fe}_3\text{O}_4$  was investigated. Figure S1 shows that the dissolution percentage in the case of unfunctionalized  $\text{Fe}_3\text{O}_4$  was high (considered 100%) compared with 20% in the case of polyacrylamide-functionalized  $\text{Fe}_3\text{O}_4$ . This means that there is a protection from dissolution in an acidic medium, making the polyacrylamide-functionalized  $\text{Fe}_3\text{O}_4$  more suitable for heavy metals adsorption, which usually occurs in an acidic medium.
